# Supplementary material for: Impact of gold nanoparticles shape on their cytotoxicity against human osteoblast and osteosarcoma in in vitro model. Evaluation of the safety of use and anti-cancer potential
Source: PubMed Central journal article supplement (PMC6373298; doi:10.1007/s10856-019-6221-2), 2019-02-12
Supplement: 10856_2019_6221_MOESM1_ESM.pdf [file 10856_2019_6221_MOESM1_ESM.pdf]

## Impact of gold nanoparticles shape on their cytotoxicity against human osteoblast and osteosarcoma in *in vitro* model. Evaluation of the safety of use and anti-cancer potential.

Karol P. Steckiewicz<sup>1</sup>, Ewelina Barcińska<sup>1</sup>, Anna Malankowska<sup>2</sup>, Agata Zauszkiewicz – Pawlak<sup>4</sup>, Grzegorz Nowaczyk<sup>3</sup>, Adriana Zaleska-Medynska<sup>2</sup>, Iwona Inkielewicz-Stępnik<sup>1</sup>

<sup>1</sup>Department of Medical Chemistry, Medical University of Gdańsk, Dębinki 1, 80-211 Gdansk, Poland

<sup>2</sup>Department of Environmental Technology, Faculty of Chemistry, University of Gdansk, Wita Stwosza 63, 80-308 Gdansk, Poland

<sup>3</sup>NanoBioMedical Center, Adam Mickiewicz University, 61-614 Poznan, Poland

<sup>4</sup>Department of Histology, Medical University of Gdańsk, Dębinki 1, 80-211 Gdansk, Poland

Corresponding author: Iwona Inkielewicz-Stępnik, [iinkiel@gumed.edu.pl](mailto:iinkiel@gumed.edu.pl), tel. +48 58 349 1450

### Electronic Supplementary Material

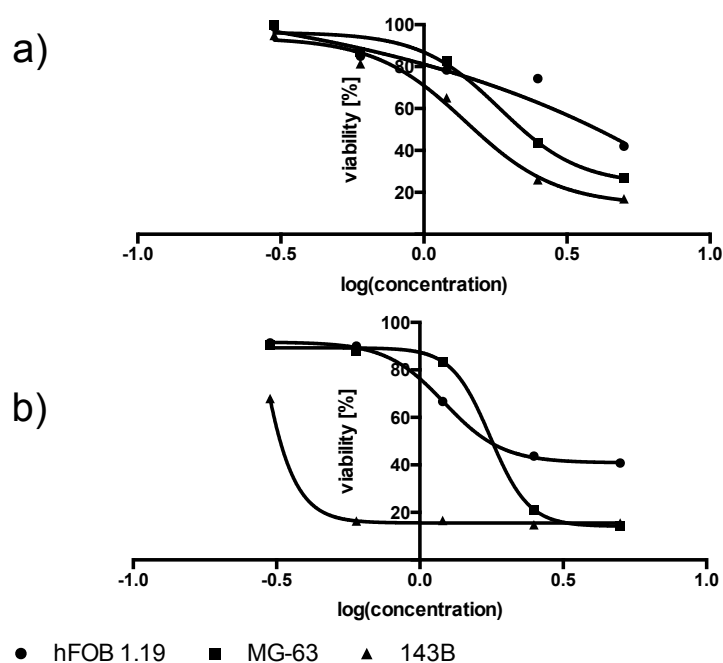

**Fig.** Log(concentration) vs. cell viability plots. Non-linear regression analysis: log(inhibitor) vs. normalized response has been performed to calculate log IC<sub>50</sub> values. Calculation were made for three cell lines (hFOB1.19, MG-63 and 143B), using (a) MTT and (b) NR assay. The obtained data are reported as the mean ± SD for triplicate determination of 3 separate experiments
